# Supplementary material for: Gut microbiota from green tea polyphenol-dosed mice improves intestinal epithelial homeostasis and ameliorates experimental colitis
Source: PubMed Central journal article supplement (PMC8424887; doi:10.1186/s40168-021-01115-9), 2021-09-07

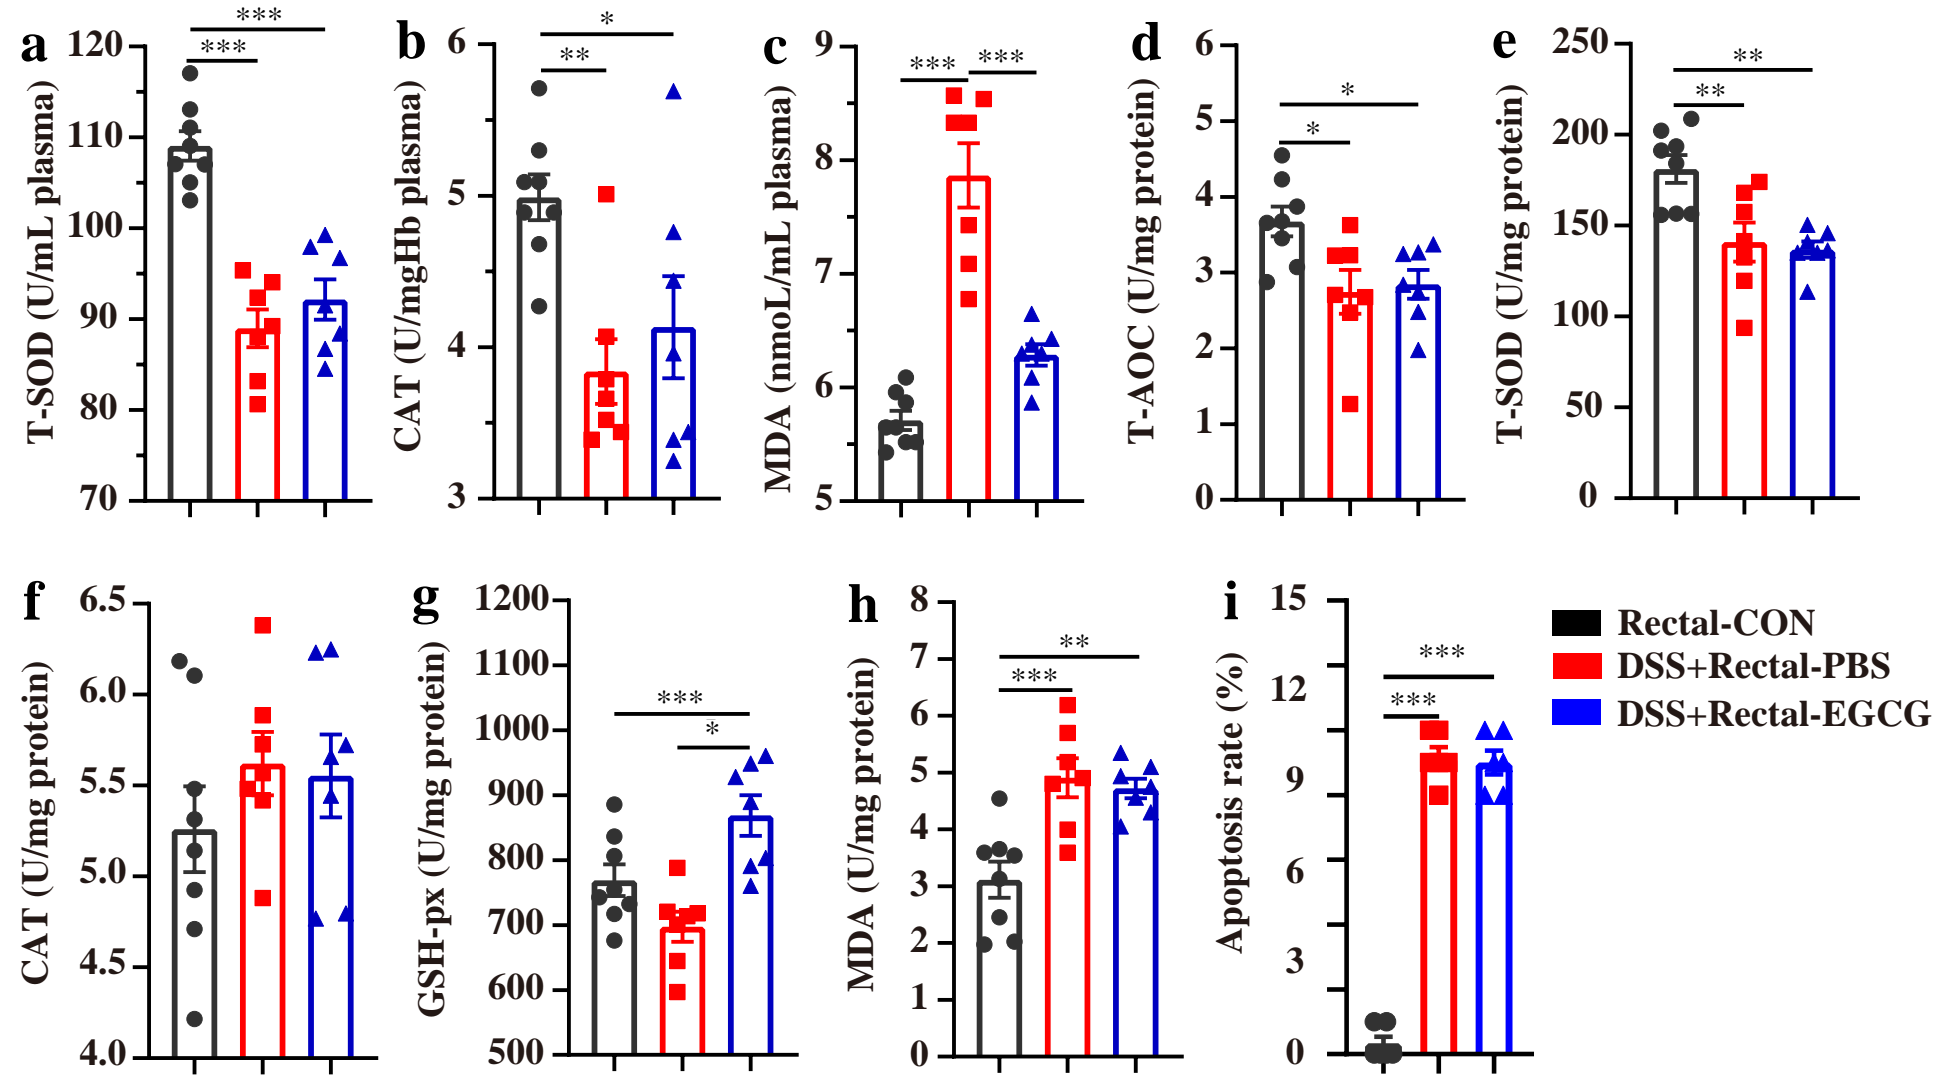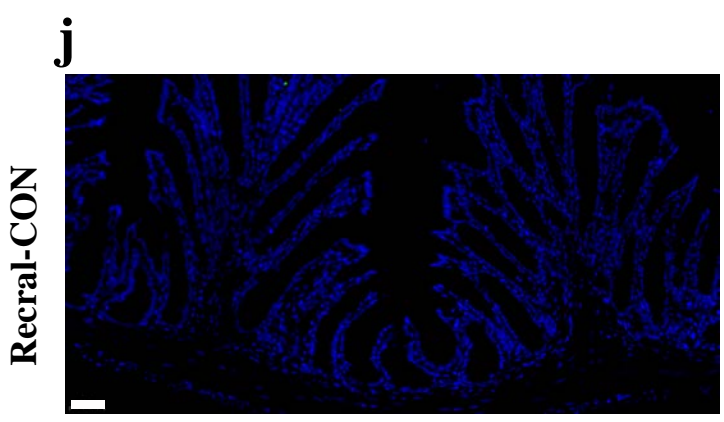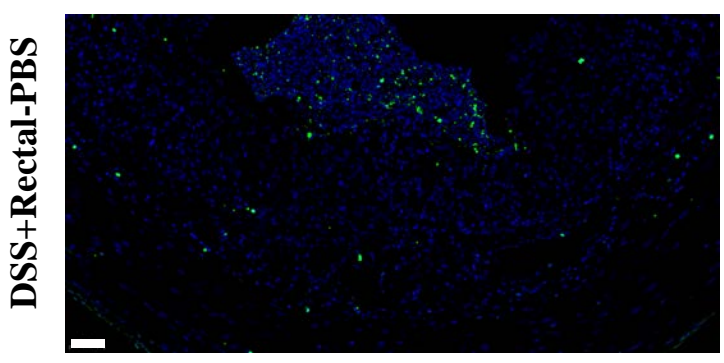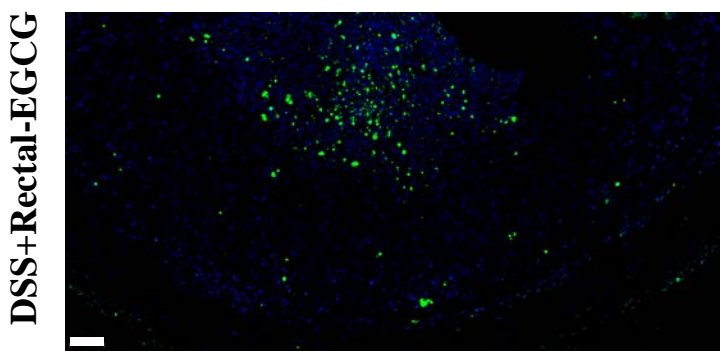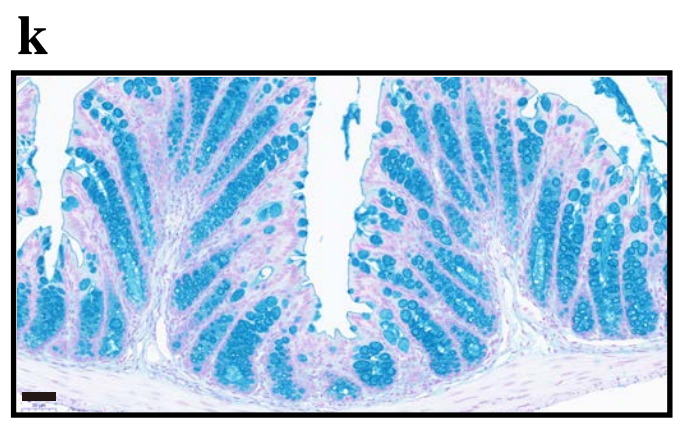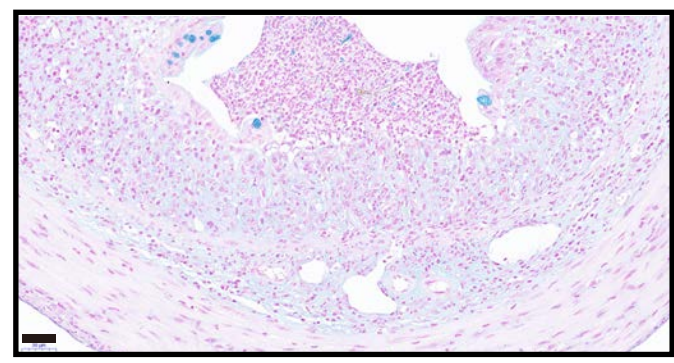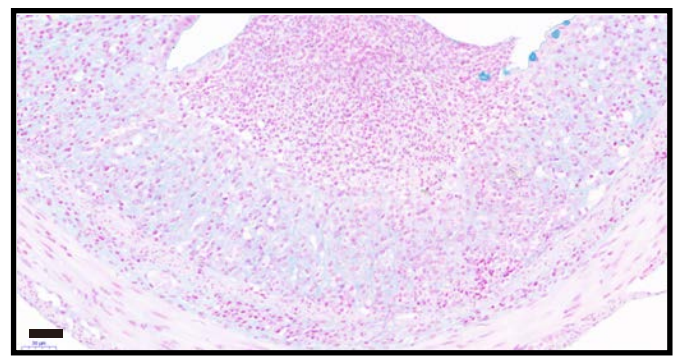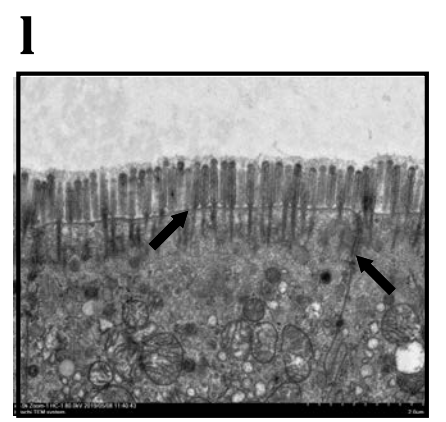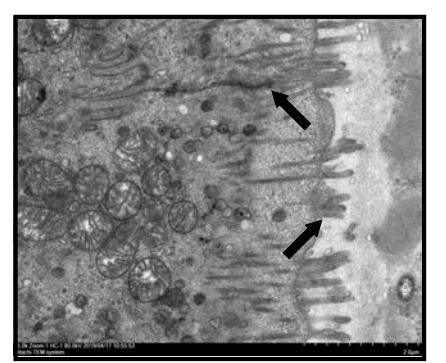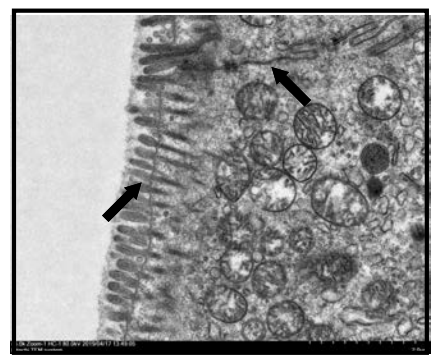

Supplement: 40168_2021_1115_MOESM2_ESM.pdf [file 40168_2021_1115_MOESM2_ESM.pdf]
